# Supplementary material
Source: Springer Nature journal article supplement (https://www.springermedizin.de/resource/supplementary/13012_2006_196_MOESM6_ESM.pdf/9629446)

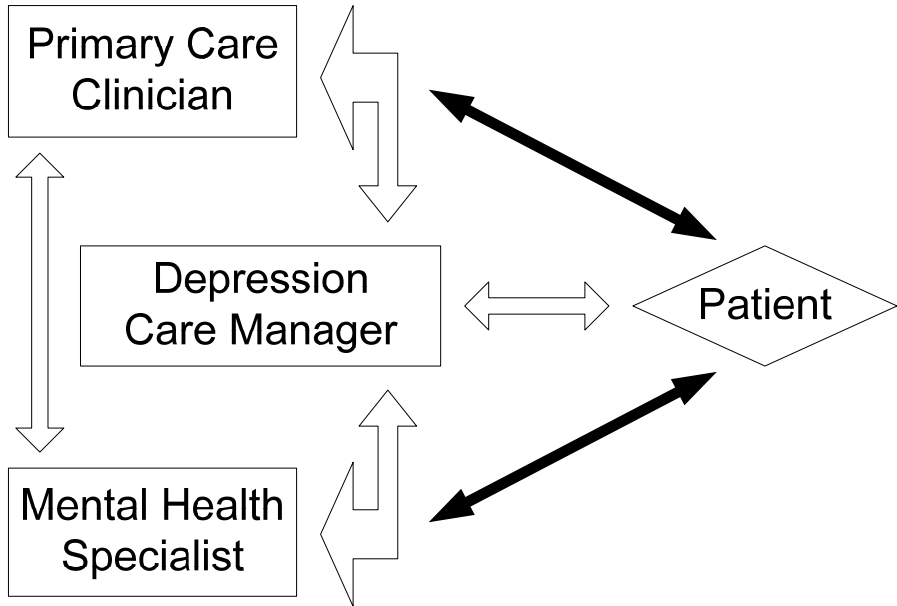

Supplement: MOESM6 [file 9629446]
